# Supplementary material for: Construction of a ratio fluorescence assay of 5-aminosalicylic acid based on its aggregation induced emission with blue emitting N/P-codoped carbon dots
Source: Royal Society of Chemistry journal article supplement (doi:10.1039/d0ra10258j), 2021-01-01
Supplement: d0ra10258j1.pdf [file d0ra10258j1.pdf]

Construction of a ratio fluorescence assay of 5-aminosalicylic acid  
based on its aggregation induced emission with blue emitting N/P-  
codoped carbon dots

Yingying Hu<sup>a</sup>, Yongping Wang<sup>a</sup>, Rentian Guan<sup>a</sup>, Cong Zhang<sup>a</sup>, Xiaodong Shao<sup>b</sup>,  
Qiaoli Yue<sup>a\*</sup>

<sup>a</sup> Shandong Provincial Key Laboratory of Chemical Energy Storage and Novel Cell  
Technology, School of Chemistry and Chemical Engineering, Liaocheng University,  
Liaocheng 252059, China

<sup>b</sup> State Key Laboratory for Performance and Structure Safety of Petroleum Tubular  
Goods and Equipment Materials, Tubular Goods Research Institute, Xian 710077,  
China

Corresponding author:

Dr. Qiaoli Yue

Email, [yueqiaoli@yahoo.com](mailto:yueqiaoli@yahoo.com)

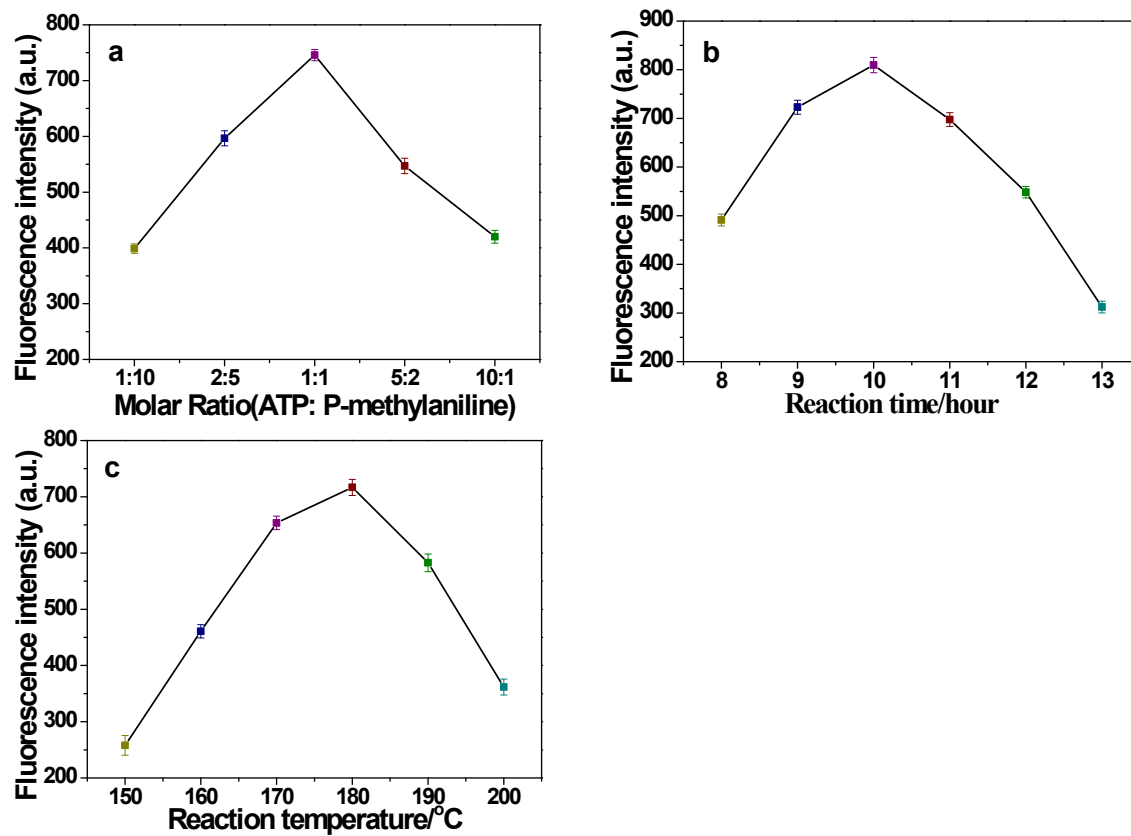

Fig. S1 Effect of the molar ratio of ATP: p-toluidine (a), reaction time (b) and temperature (c) on the fluorescence intensity of NPCDs.

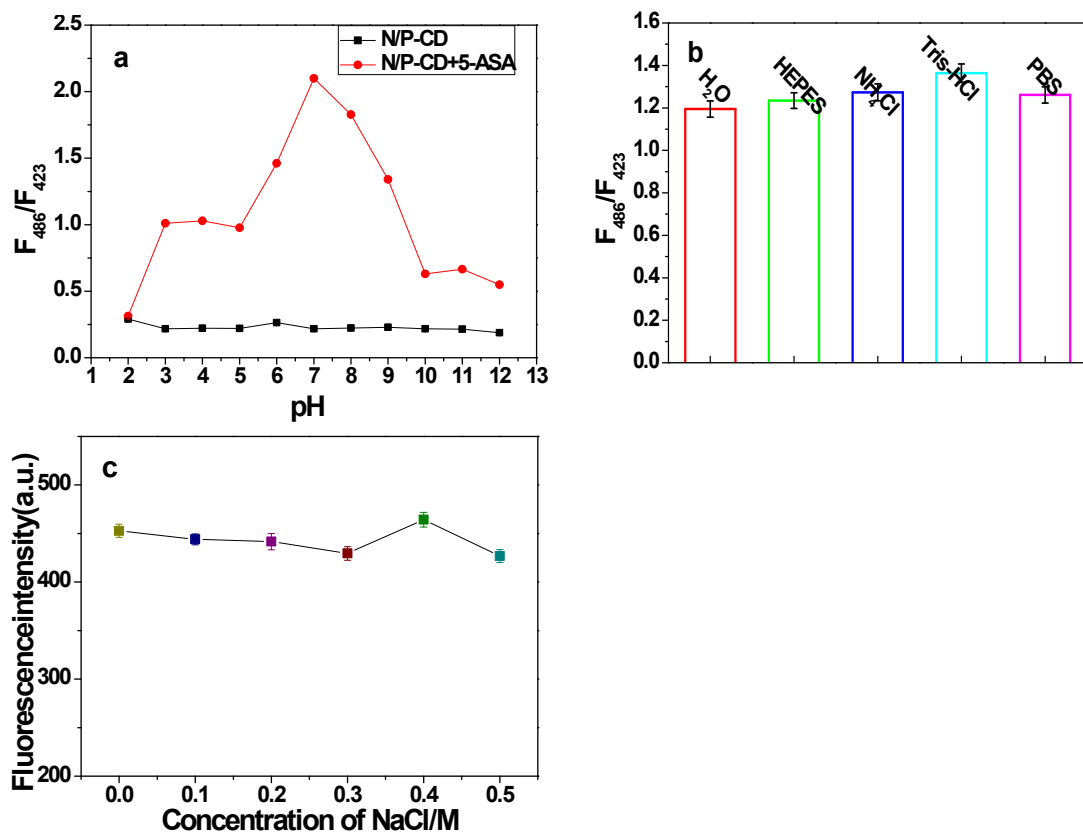

Fig. S2 Effect of pH (a), buffer solution (b), and NaCl concentration (c) on the fluorescence intensity of NPCDs.

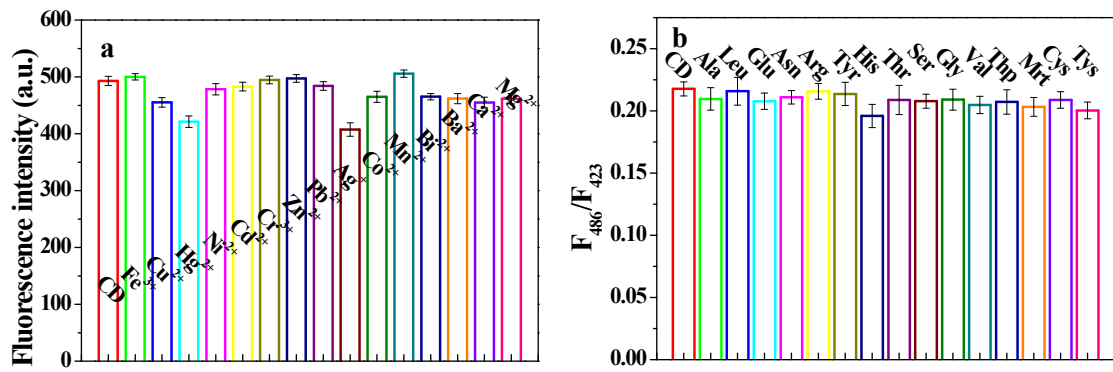

Fig. S3 Effect of metal ions (a) and amino acids (b) on the fluorescence intensity of NPCDs.

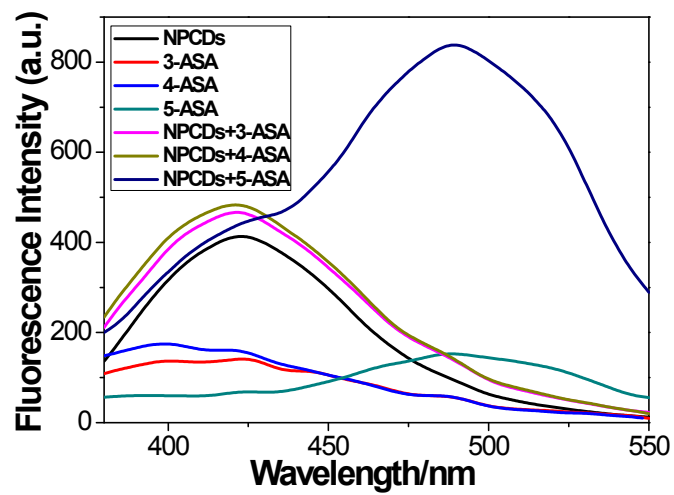

Fig. S4 Fluorescence spectra of NPCDs with and without 3-ASA, 4-ASA and 5-ASA.
